# Supplementary material for: Photoreduction of copper ions using silica–surfactant hybrid and titanium (IV) oxide under sulfuric acid conditions
Source: Research Square preprint supplement (doi:10.21203/rs.3.rs-1535730/v1), 2022-04-18
Supplement: Supplementary file 1 [file 3fb6d5b05adfa08841b2ab02.docx]

**Supporting information**

Photoreduction of copper ions using silica–surfactant hybrid and titanium (IV) oxide under sulfuric acid conditions

*Shingo Machidaa*, Reo Katoa, Kaishi Hasegawaa, Takahiro Gotohb, Ken-ichi Katsumataa, and Atsuo Yasumoria*

a Department of Material Science and Technology, Faculty of Advanced Engineering, Tokyo University of Science, 6-3-1 Niijuku, Katsushika-ku, Tokyo 125-8585, Japan

b Material Characterization Central Laboratory, School of Science and Engineering, Waseda University, 3-4-1, Okubo, Shinjuku-ku, Tokyo 169-8555, Japan

*E-mail: [shingo.machida@rs.tus.ac.jp](mailto:shingo.machida@rs.tus.ac.jp)

**Number of pages: 2**

**Number of figures: 2**

**Figures**





Figure S1. FE-SEM image of ASP.

**
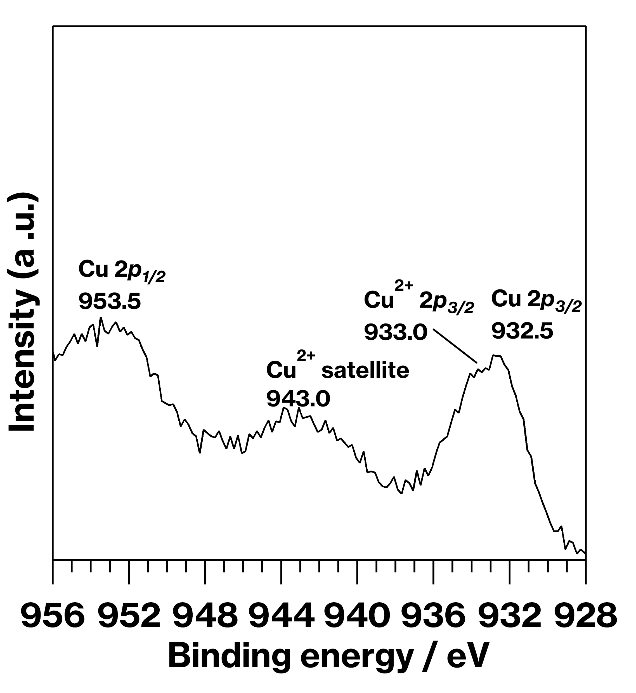
**

Figure S2. XPS spectrum of Cu–P25–ASP.
